# Supplementary material for: Accurate determination of ultra-trace rare earth elements by LA-ICP-MS/MS and its application to cassiterite for effective elimination of Gd and Tb false positive anomalies
Source: Royal Society of Chemistry journal article supplement (doi:10.1039/d4ja00271g), 2024-01-01
Supplement: d4ja00271g1.pdf [file d4ja00271g1.pdf]

## Supporting Information for

### Accurate determination of ultra-trace rare earth elements by LA-ICP-MS/MS and its application to cassiterite for effective elimination of Gd and Tb false positive anomalies

Ming Yang<sup>a,b</sup>, Wu Wei<sup>c</sup>, Yue-Heng Yang<sup>b\*</sup>, Rolf L. Romer<sup>d</sup>, Shi-Tou Wu<sup>b</sup>, Tao Wu<sup>a,e</sup>, Li-Feng Zhong<sup>c</sup>

<sup>a</sup> Hainan Institute, Zhejiang University, Sanya 572025, China

<sup>b</sup> State Key Laboratory of Lithospheric and Environmental Coevolution, Institute of Geology and Geophysics, Chinese Academy of Sciences, Beijing 100029, China

<sup>c</sup> Southern Marine Science and Engineering Guangdong Laboratory (Zhuhai), Zhuhai 519080, China

<sup>d</sup> GFZ German Research Centre for Geosciences, Telegrafenberg, 14473 Potsdam, Germany

<sup>e</sup> Ocean College, Zhejiang University, Zhoushan, 316021, China

\* Corresponding author: [yangyueheng@mail.iggcas.ac.cn](mailto:yangyueheng@mail.iggcas.ac.cn)

**Table S1** Instrumental operation parameters used for LA-ICP-MS/MS and LA-SF-ICP-MS analysis.

**Table S2** Rare earth element contents obtained by solution-based methods.

**Table S3** Rare earth element contents of cassiterite samples investigated in this study obtained by LA-SF-ICP-MS.

**Table S4** Rare earth element contents of cassiterite samples investigated in this study obtained by LA-ICP-MS/MS.

**Table S5** Signal intensity data (cps) obtained by LA-ICP-MS/MS in this study.

**Table S1** Instrumental operation parameters used for LA-ICP-MS/MS and LA-SF-ICP-MS analysis.

| Analysis                                       | LA-ICP-MS/MS                                                                                                                                                                                                                                                                                                                                                                                                                                                                                                                                                                                     | LA-SF-ICP-MS                                                                                                                                                                                                                                                                                                                                            |
|------------------------------------------------|--------------------------------------------------------------------------------------------------------------------------------------------------------------------------------------------------------------------------------------------------------------------------------------------------------------------------------------------------------------------------------------------------------------------------------------------------------------------------------------------------------------------------------------------------------------------------------------------------|---------------------------------------------------------------------------------------------------------------------------------------------------------------------------------------------------------------------------------------------------------------------------------------------------------------------------------------------------------|
| <b>Laser ablation system</b>                   | <b>New Wave Research, NWR 193 HE</b>                                                                                                                                                                                                                                                                                                                                                                                                                                                                                                                                                             | <b>Coherent, Geolas HD ArF excimer</b>                                                                                                                                                                                                                                                                                                                  |
| Ablation Cell                                  | Two volume cell                                                                                                                                                                                                                                                                                                                                                                                                                                                                                                                                                                                  | In-house cell, aerosol dispersion volume <3 cm <sup>3</sup>                                                                                                                                                                                                                                                                                             |
| Wavelength (nm)                                | 193                                                                                                                                                                                                                                                                                                                                                                                                                                                                                                                                                                                              | 193                                                                                                                                                                                                                                                                                                                                                     |
| Laser fluence (J cm <sup>-2</sup> )            | 3.5                                                                                                                                                                                                                                                                                                                                                                                                                                                                                                                                                                                              | 5                                                                                                                                                                                                                                                                                                                                                       |
| Ablation frequency (Hz)                        | 8                                                                                                                                                                                                                                                                                                                                                                                                                                                                                                                                                                                                | 6                                                                                                                                                                                                                                                                                                                                                       |
| Laser spot size (μm)                           | 120                                                                                                                                                                                                                                                                                                                                                                                                                                                                                                                                                                                              | 120                                                                                                                                                                                                                                                                                                                                                     |
| Ablation duration (s)                          | 60                                                                                                                                                                                                                                                                                                                                                                                                                                                                                                                                                                                               | 60                                                                                                                                                                                                                                                                                                                                                      |
| Ablation mode                                  | Spot                                                                                                                                                                                                                                                                                                                                                                                                                                                                                                                                                                                             | Spot                                                                                                                                                                                                                                                                                                                                                    |
| Ablation gas flow (L min <sup>-1</sup> )       | 0.72 (He)                                                                                                                                                                                                                                                                                                                                                                                                                                                                                                                                                                                        | 0.75 (He)                                                                                                                                                                                                                                                                                                                                               |
| <b>Mass spectrometry</b>                       | <b>PeikinElmer NexION5000 ICP-MS/MS</b>                                                                                                                                                                                                                                                                                                                                                                                                                                                                                                                                                          | <b>Thermo Fisher Scientific Element XR SF-ICP-MS</b>                                                                                                                                                                                                                                                                                                    |
| RF power (W)                                   | 1350                                                                                                                                                                                                                                                                                                                                                                                                                                                                                                                                                                                             | 1320                                                                                                                                                                                                                                                                                                                                                    |
| Mass resolution (m/Δm)                         | -                                                                                                                                                                                                                                                                                                                                                                                                                                                                                                                                                                                                | 300                                                                                                                                                                                                                                                                                                                                                     |
| Cool gas flow rate (L min <sup>-1</sup> )      | 15 (Ar)                                                                                                                                                                                                                                                                                                                                                                                                                                                                                                                                                                                          | 15 (Ar)                                                                                                                                                                                                                                                                                                                                                 |
| Auxiliary gas flow rate (L min <sup>-1</sup> ) | 1.0 (Ar)                                                                                                                                                                                                                                                                                                                                                                                                                                                                                                                                                                                         | 0.8 (Ar)                                                                                                                                                                                                                                                                                                                                                |
| Carrier gas flow rate (L min <sup>-1</sup> )   | 0.85 (Ar)                                                                                                                                                                                                                                                                                                                                                                                                                                                                                                                                                                                        | 0.95 (Ar)                                                                                                                                                                                                                                                                                                                                               |
| Cell gas flow rate (mL min <sup>-1</sup> )     | 1.1 (O <sub>2</sub> )                                                                                                                                                                                                                                                                                                                                                                                                                                                                                                                                                                            | None                                                                                                                                                                                                                                                                                                                                                    |
| Analytical mode                                | Mass-shift                                                                                                                                                                                                                                                                                                                                                                                                                                                                                                                                                                                       | E-scan                                                                                                                                                                                                                                                                                                                                                  |
| Isotopes measured and dwell time (ms)          | <sup>139</sup> La <sup>16</sup> O (15), <sup>140</sup> Ce <sup>16</sup> O (15),<br><sup>141</sup> Pr <sup>16</sup> O (15), <sup>146</sup> Nd <sup>16</sup> O (15),<br><sup>147</sup> Sm <sup>16</sup> O (15), <sup>153</sup> Eu <sup>16</sup> O (15),<br><sup>157</sup> Gd <sup>16</sup> O (15), <sup>159</sup> Tb <sup>16</sup> O (15),<br><sup>163</sup> Dy <sup>16</sup> O (15), <sup>165</sup> Ho <sup>16</sup> O (15),<br><sup>166</sup> Er <sup>16</sup> O (15), <sup>169</sup> Tm <sup>16</sup> O (15),<br><sup>172</sup> Yb <sup>16</sup> O (15), <sup>175</sup> Lu <sup>16</sup> O (15) | <sup>139</sup> La (15), <sup>140</sup> Ce (15), <sup>141</sup> Pr (15), <sup>146</sup> Nd (15),<br><sup>147</sup> Sm (15), <sup>153</sup> Eu (15), <sup>157</sup> Gd (15), <sup>159</sup> Tb (15),<br><sup>163</sup> Dy (15), <sup>165</sup> Ho (15), <sup>166</sup> Er (15), <sup>169</sup> Tm (15),<br><sup>172</sup> Yb (15), <sup>175</sup> Lu (15) |

**Table S2** Rare earth element contents obtained by solution-based methods.

| □                    | ICP-MS/MS (Sol.) |      |       |      |       |      | SF-ICP-MS (Sol.) |      |       |      |       |      | Ref. <sup>23</sup> |      |
|----------------------|------------------|------|-------|------|-------|------|------------------|------|-------|------|-------|------|--------------------|------|
|                      | 19HS             |      | XBD   |      | GSR-3 |      | 19HS             |      | XBD   |      | GSR-3 |      | GSR-3              |      |
|                      | n=1              | 2SE  | n=1   | 2SE  | n=1   | 2SE  | n=1              | 2SE  | n=1   | 2SE  | n=1   | 2SE  | n=1                | 2SD  |
| La                   | 210              | 8.00 | 3.12  | 0.12 | 57.4  | 1.38 | 208              | 6.2  | 3.19  | 0.10 | 58.0  | 1.63 | 56.0               | 2.10 |
| Ce                   | 785              | 29.9 | 129   | 4.92 | 107   | 2.23 | 784              | 23.5 | 129   | 3.86 | 108   | 2.29 | 105                | 4.00 |
| Pr                   | 73.5             | 2.79 | 1.13  | 0.04 | 13.0  | 0.20 | 74.0             | 2.22 | 1.14  | 0.03 | 13.3  | 0.35 | 13.2               | 0.50 |
| Nd                   | 309              | 11.8 | 1.69  | 0.06 | 53.8  | 0.22 | 308              | 9.30 | 1.66  | 0.05 | 54.9  | 1.16 | 54.0               | 1.80 |
| Sm                   | 109              | 4.14 | 1.07  | 0.04 | 10.4  | 0.20 | 109              | 3.27 | 1.09  | 0.03 | 10.5  | 0.24 | 10.2               | 0.40 |
| Eu                   | 60.8             | 2.31 | 1.64  | 0.06 | 3.30  | 0.10 | 60.8             | 1.82 | 1.64  | 0.05 | 3.31  | 0.11 | 3.20               | 0.11 |
| Gd                   | 160              | 6.09 | 1.33  | 0.05 | 8.75  | 0.26 | 159              | 4.78 | 1.37  | 0.04 | 8.70  | 0.25 | 8.50               | 0.19 |
| Tb                   | 40.3             | 1.53 | 1.09  | 0.04 | 1.18  | 0.02 | 40.3             | 1.21 | 1.19  | 0.04 | 1.22  | 0.04 | 1.20               | 0.04 |
| Dy                   | 343              | 13.0 | 13.3  | 0.51 | 5.75  | 0.15 | 343              | 10.3 | 13.3  | 0.40 | 5.79  | 0.17 | 5.60               | 0.17 |
| Ho                   | 82.4             | 3.14 | 7.26  | 0.28 | 0.91  | 0.03 | 82.9             | 2.49 | 7.26  | 0.22 | 0.90  | 0.03 | 0.88               | 0.05 |
| Er                   | 298              | 11.3 | 69.3  | 2.64 | 2.05  | 0.05 | 298              | 8.90 | 69.7  | 2.09 | 2.03  | 0.07 | 2.00               | 0.10 |
| Tm                   | 60.4             | 2.30 | 42.0  | 1.60 | 0.27  | 0.01 | 60.4             | 1.81 | 42.3  | 1.27 | 0.28  | 0.01 | 0.28               | 0.01 |
| Yb                   | 622              | 23.7 | 808   | 30.8 | 1.47  | 0.03 | 622              | 18.7 | 809   | 24.3 | 1.52  | 0.05 | 1.50               | 0.07 |
| Lu                   | 118              | 4.49 | 279   | 10.6 | 0.19  | 0.01 | 118              | 3.55 | 280   | 8.40 | 0.20  | 0.01 | 0.19               | 0.01 |
| Ce/Ce*               | 1.55             |      | 16.9  |      | 0.96  |      | 1.55             |      | 16.6  |      | 0.96  |      | 0.95               |      |
| Eu/Eu*               | 1.41             |      | 4.18  |      | 1.06  |      | 1.41             |      | 4.09  |      | 1.06  |      | 1.05               |      |
| (La/Yb) <sub>N</sub> | 0.242            |      | 0.003 |      | 28.0  |      | 0.239            |      | 0.003 |      | 27.9  |      | 26.8               |      |

Note:

$$1. Ce/Ce^* = Ce_N / \sqrt{La_N * Pr_N}; Eu/Eu^* = Eu_N / \sqrt{Sm_N * Gd_N}.$$

2. "N" represents normalized by Chondrite values <sup>31</sup>; "SE" means standard error; "SD" means standard deviation.

3. Rare earth element contents in cassiterite samples are given in ng g<sup>-1</sup> and given in μg g<sup>-1</sup>.

4. All analyzed cassiterite samples are heterogeneous. Even though chondrite-normalized REE patterns are similar within individual grains, the corresponding REE contents may vary by two orders of magnitude.

**Table S3** Rare earth element contents of cassiterite samples investigated in this study obtained by LA-SF-ICP-MS.

| Sample                                                               | La   | Ce   | Pr   | Nd    | Sm   | Eu   | Gd   | Tb   | Dy   | Ho   | Er   | Tm   | Yb   | Lu   | Ce/Ce* | Eu/Eu* | (La/Yb) <sub>N</sub> |
|----------------------------------------------------------------------|------|------|------|-------|------|------|------|------|------|------|------|------|------|------|--------|--------|----------------------|
| 19HS, Huangsha quartz-vien type tin deposit, Jiangxi Province, China |      |      |      |       |      |      |      |      |      |      |      |      |      |      |        |        |                      |
| 19HS-1                                                               | 2.00 | 30.7 | 2.80 | 7.80  | 2.90 | 2.35 | 1520 | 126  | 4.70 | 0.96 | 3.70 | 2.90 | 22.0 | 6.20 | 3.18   | 0.11   | 0.065                |
| 19HS-2                                                               | 3.62 | 41.4 | 3.20 | 20.8  | 11.4 | 5.90 | 1442 | 126  | 9.00 | 6.70 | 24.0 | 6.60 | 88.0 | 16.6 | 2.98   | 0.14   | 0.030                |
| 19HS-3                                                               | 12.0 | 103  | 13.2 | 27.4  | 8.70 | 6.35 | 1448 | 124  | 9.10 | 2.30 | 11.4 | 2.80 | 32.0 | 6.00 | 2.01   | 0.17   | 0.269                |
| 19HS-4                                                               | 8.50 | 73.5 | 6.90 | 25.0  | 5.70 | 5.90 | 1495 | 124  | 8.90 | 2.50 | 8.60 | 2.80 | 26.3 | 4.90 | 2.35   | 0.20   | 0.232                |
| 19HS-5                                                               | 1.50 | 21.7 | 1.60 | 5.20  | 1.90 | 3.75 | 1550 | 140  | 9.20 | 0.91 | 2.90 | 0.90 | 23.0 | 5.90 | 3.43   | 0.21   | 0.047                |
| 19HS-6                                                               | 37.0 | 230  | 24.2 | 81.0  | 46.0 | 17.4 | 1625 | 148  | 124  | 31.0 | 127  | 24.5 | 220  | 39.0 | 1.88   | 0.19   | 0.121                |
| 19HS-7                                                               | 20.0 | 161  | 17.4 | 76.5  | 24.0 | 16.7 | 1702 | 154  | 17.0 | 6.60 | 24.6 | 4.30 | 63.0 | 12.9 | 2.12   | 0.25   | 0.228                |
| 19HS-8                                                               | 76.0 | 362  | 31.1 | 106.5 | 26.0 | 13.9 | 1785 | 174  | 74.0 | 21.4 | 63.0 | 16.7 | 124  | 19.7 | 1.83   | 0.20   | 0.440                |
| 19HS-9                                                               | 41.0 | 252  | 15.5 | 60.0  | 19.5 | 9.60 | 1801 | 157  | 18.0 | 4.30 | 16.6 | 5.40 | 52.0 | 10.7 | 2.45   | 0.16   | 0.566                |
| XBD, Xuebaoding pegmatite tin deposit, Sichuan Province, China       |      |      |      |       |      |      |      |      |      |      |      |      |      |      |        |        |                      |
| XBD-1                                                                | 0.40 | 19.3 | 1.60 | 4.25  | 1.40 | 0.89 | 1372 | 111  | 10.6 | 6.50 | 56.0 | 32.2 | 722  | 177  | 5.91   | 0.06   | 0.0004               |
| XBD-2                                                                | 3.90 | 22.8 | 2.20 | 2.00  | 1.70 | 0.75 | 1336 | 97   | 15.0 | 12.4 | 120  | 58.2 | 1172 | 328  | 1.91   | 0.05   | 0.0024               |
| XBD-3                                                                | 3.60 | 21.5 | 2.10 | 1.30  | 1.20 | 0.61 | 1360 | 110  | 32.0 | 12.4 | 101  | 46.6 | 970  | 278  | 1.92   | 0.05   | 0.0027               |
| XBD-4                                                                | 3.60 | 17.9 | 2.40 | 1.75  | 1.10 | 0.68 | 1318 | 109  | 24.3 | 3.50 | 41.9 | 21.6 | 466  | 132  | 1.49   | 0.05   | 0.0055               |
| XBD-5                                                                | 3.51 | 21.4 | 1.00 | 1.50  | 1.90 | 0.88 | 1393 | 105  | 24.0 | 5.50 | 34.9 | 21.0 | 439  | 117  | 2.80   | 0.05   | 0.0057               |
| XBD-6                                                                | 2.60 | 15.6 | 2.20 | 1.75  | 0.73 | 0.40 | 1402 | 112  | 24.0 | 6.10 | 73.0 | 40.0 | 857  | 236  | 1.60   | 0.04   | 0.0022               |
| XBD-7                                                                | 1.60 | 21.0 | 1.10 | 1.70  | 0.70 | 0.77 | 1429 | 122  | 18.9 | 3.80 | 52.1 | 29.6 | 714  | 177  | 3.88   | 0.07   | 0.0016               |
| XBD-8                                                                | 4.00 | 23.9 | 2.00 | 2.00  | 0.62 | 0.35 | 1464 | 114  | 12.8 | 5.00 | 41.2 | 26.2 | 523  | 120  | 2.07   | 0.04   | 0.0055               |
| XBD-9                                                                | 1.70 | 29.1 | 2.20 | 3.40  | 1.80 | 1.45 | 1479 | 136  | 60.0 | 16.2 | 116  | 64.0 | 1178 | 272  | 3.69   | 0.09   | 0.0010               |
| XBD-10                                                               | 2.20 | 15.1 | 1.70 | 1.60  | 0.61 | 1.70 | 1428 | 125  | 28.0 | 6.80 | 55.9 | 38.9 | 733  | 180  | 1.91   | 0.18   | 0.0022               |
| Glass reference materials' results obtained by LA-SF-ICP-MS          |      |      |      |       |      |      |      |      |      |      |      |      |      |      |        |        |                      |
| Sample                                                               | La   | Ce   | Pr   | Nd    | Sm   | Eu   | Gd   | Tb   | Dy   | Ho   | Er   | Tm   | Yb   | Lu   | Ce/Ce* | Eu/Eu* | (La/Yb) <sub>N</sub> |
| NIST612-1                                                            | 35.8 | 37.8 | 37.2 | 35.6  | 37.2 | 35.6 | 37.0 | 37.8 | 35.7 | 37.7 | 37.5 | 37.9 | 38.8 | 36.4 | -      | -      | -                    |
| NIST612-2                                                            | 36.5 | 40.5 | 40.7 | 38.6  | 40.4 | 38.5 | 40.8 | 41.5 | 39.3 | 39.3 | 38.8 | 41.6 | 39.9 | 38.0 | -      | -      | -                    |
| NIST612-3                                                            | 35.8 | 38.6 | 38.3 | 35.6  | 38.6 | 35.8 | 37.7 | 38.3 | 36.0 | 37.9 | 37.7 | 37.6 | 38.9 | 36.6 | -      | -      | -                    |
| NIST612-4                                                            | 36.2 | 39.1 | 38.9 | 36.7  | 38.5 | 36.7 | 38.6 | 39.3 | 37.1 | 38.7 | 38.3 | 39.1 | 39.6 | 37.5 | -      | -      | -                    |
| NIST612-5                                                            | 36.0 | 37.2 | 36.4 | 34.1  | 36.2 | 34.3 | 35.9 | 36.4 | 34.2 | 38.2 | 37.9 | 35.3 | 39.1 | 36.8 | -      | -      | -                    |

**Table S3** (Continued) Rare earth element contents of cassiterite samples investigated in this study obtained by LA-SF-ICP-MS.

| Sample     | La   | Ce   | Pr   | Nd   | Sm   | Eu   | Gd   | Tb   | Dy   | Ho   | Er   | Tm   | Yb   | Lu   | Ce/Ce* | Eu/Eu* | (La/Yb) <sub>N</sub> |
|------------|------|------|------|------|------|------|------|------|------|------|------|------|------|------|--------|--------|----------------------|
| NIST612-6  | 36.0 | 38.6 | 38.2 | 35.8 | 37.6 | 35.7 | 37.5 | 37.8 | 35.7 | 38.4 | 38.1 | 37.0 | 39.3 | 37.1 | -      | -      | -                    |
| NIST612-7  | 36.1 | 39.6 | 38.9 | 36.2 | 38.8 | 36.8 | 38.8 | 39.0 | 37.0 | 38.5 | 38.2 | 38.0 | 39.4 | 37.2 | -      | -      | -                    |
| NIST612-8  | 35.8 | 36.5 | 36.5 | 34.0 | 36.2 | 33.6 | 35.8 | 35.9 | 33.6 | 37.8 | 37.6 | 34.9 | 38.8 | 36.5 | -      | -      | -                    |
| NIST612-9  | 36.0 | 37.7 | 36.6 | 34.1 | 36.6 | 34.1 | 36.0 | 36.1 | 33.9 | 38.3 | 38.0 | 35.1 | 39.2 | 37.0 | -      | -      | -                    |
| NIST612-10 | 36.0 | 37.6 | 37.5 | 35.5 | 37.8 | 35.6 | 37.2 | 37.5 | 35.4 | 38.3 | 38.0 | 36.6 | 39.2 | 37.0 | -      | -      | -                    |
| NIST612-11 | 36.0 | 39.9 | 39.5 | 36.6 | 39.1 | 37.1 | 38.5 | 38.8 | 36.8 | 38.4 | 38.1 | 37.7 | 39.3 | 37.1 | -      | -      | -                    |
| NIST612-12 | 35.9 | 37.9 | 36.7 | 34.5 | 36.6 | 34.5 | 36.3 | 36.5 | 34.3 | 38.1 | 37.8 | 35.6 | 39.1 | 36.8 | -      | -      | -                    |
| NIST612-13 | 36.0 | 38.4 | 37.9 | 35.8 | 37.4 | 35.5 | 37.1 | 37.5 | 35.2 | 38.3 | 38.0 | 36.7 | 39.2 | 37.0 | -      | -      | -                    |
| NIST612-14 | 36.0 | 38.8 | 38.5 | 35.9 | 38.4 | 36.2 | 37.8 | 38.2 | 36.2 | 38.3 | 38.0 | 37.7 | 39.2 | 37.0 | -      | -      | -                    |
| NIST612-15 | 35.9 | 38.4 | 37.8 | 35.3 | 37.6 | 35.5 | 37.2 | 37.4 | 35.4 | 38.2 | 38.0 | 36.6 | 39.1 | 37.0 | -      | -      | -                    |
| NIST612-16 | 36.2 | 38.4 | 38.0 | 35.7 | 37.8 | 35.9 | 37.5 | 37.9 | 35.6 | 38.4 | 38.0 | 37.1 | 39.3 | 37.0 | -      | -      | -                    |
| NIST612-17 | 36.0 | 38.3 | 37.8 | 35.8 | 37.6 | 35.7 | 37.3 | 37.7 | 35.7 | 38.4 | 38.0 | 37.1 | 39.2 | 37.1 | -      | -      | -                    |
| NIST612-18 | 35.9 | 38.4 | 38.0 | 35.5 | 37.8 | 35.4 | 37.2 | 37.5 | 35.4 | 38.2 | 38.0 | 36.6 | 39.2 | 36.9 | -      | -      | -                    |
| NIST612-19 | 35.6 | 38.3 | 37.6 | 35.3 | 37.1 | 35.2 | 36.8 | 36.9 | 35.1 | 37.8 | 38.0 | 36.3 | 38.9 | 36.7 | -      | -      | -                    |
| NIST612-20 | 36.7 | 38.5 | 38.2 | 35.8 | 38.5 | 36.2 | 38.0 | 38.6 | 36.2 | 38.9 | 38.0 | 37.7 | 39.7 | 37.4 | -      | -      | -                    |
| NIST612-21 | 32.6 | 38.4 | 37.8 | 25.6 | 35.9 | 34.7 | 36.4 | 36.3 | 34.2 | 37.2 | 38.0 | 35.2 | 38.9 | 36.6 | -      | -      | -                    |
| NIST612-22 | 36.6 | 38.5 | 38.6 | 35.5 | 38.5 | 37.4 | 38.0 | 39.5 | 37.1 | 39.4 | 38.1 | 37.9 | 39.8 | 37.5 | -      | -      | -                    |
| NIST612-23 | 36.2 | 38.4 | 37.8 | 35.4 | 37.8 | 35.8 | 37.4 | 37.7 | 35.7 | 38.5 | 38.0 | 37.2 | 39.1 | 37.0 | -      | -      | -                    |
| NIST612-24 | 35.9 | 38.4 | 38.0 | 35.9 | 37.8 | 35.6 | 37.5 | 37.7 | 35.6 | 38.4 | 38.0 | 36.8 | 39.3 | 37.0 | -      | -      | -                    |
| NIST612-25 | 36.0 | 38.4 | 37.8 | 35.8 | 37.5 | 35.4 | 37.1 | 37.4 | 35.4 | 38.2 | 38.0 | 36.7 | 39.1 | 37.0 | -      | -      | -                    |
| NIST612-26 | 34.9 | 38.3 | 37.4 | 34.8 | 36.3 | 34.9 | 35.8 | 35.9 | 34.1 | 36.7 | 37.9 | 34.9 | 37.9 | 35.5 | -      | -      | -                    |
| NIST612-27 | 37.6 | 38.5 | 38.4 | 36.7 | 39.6 | 36.6 | 39.2 | 39.8 | 37.8 | 41.3 | 38.2 | 39.8 | 41.5 | 39.9 | -      | -      | -                    |
| NIST612-28 | 33.1 | 38.0 | 36.2 | 32.5 | 34.9 | 32.4 | 34.5 | 34.4 | 33.0 | 34.9 | 37.8 | 34.1 | 36.3 | 34.3 | -      | -      | -                    |
| NIST612-29 | 36.8 | 38.7 | 38.4 | 36.1 | 38.6 | 36.4 | 38.0 | 38.1 | 36.3 | 38.9 | 38.1 | 37.6 | 40.1 | 37.7 | -      | -      | -                    |
| NIST612-30 | 35.5 | 38.3 | 37.7 | 35.3 | 37.1 | 35.1 | 36.7 | 36.8 | 34.9 | 37.7 | 38.0 | 35.9 | 38.7 | 36.4 | -      | -      | -                    |
| NIST612-31 | 36.2 | 38.5 | 38.0 | 36.1 | 38.2 | 35.9 | 37.6 | 38.1 | 36.2 | 38.7 | 38.0 | 37.3 | 39.6 | 37.4 | -      | -      | -                    |
| NIST612-32 | 35.6 | 38.3 | 37.6 | 34.9 | 37.4 | 35.3 | 36.8 | 36.9 | 34.8 | 37.7 | 38.0 | 36.2 | 39.0 | 36.5 | -      | -      | -                    |
| NIST612-33 | 36.2 | 38.5 | 38.2 | 35.5 | 37.8 | 35.8 | 37.6 | 38.1 | 35.8 | 38.6 | 38.0 | 37.1 | 39.3 | 37.2 | -      | -      | -                    |

**Table S3** (Continued) Rare earth element contents of cassiterite samples investigated in this study obtained by LA-SF-ICP-MS.

| Sample   | La   | Ce   | Pr   | Nd   | Sm   | Eu   | Gd   | Tb   | Dy   | Ho   | Er   | Tm   | Yb   | Lu   | Ce/Ce* | Eu/Eu* | (La/Yb) <sub>N</sub> |
|----------|------|------|------|------|------|------|------|------|------|------|------|------|------|------|--------|--------|----------------------|
| ARM-3-1  | 3.97 | 5.65 | 3.90 | 5.33 | 4.18 | 3.86 | 4.01 | 4.46 | 4.14 | 4.23 | 3.74 | 4.36 | 5.70 | 3.92 | -      | -      | -                    |
| ARM-3-2  | 4.06 | 5.35 | 3.66 | 4.96 | 3.86 | 3.64 | 3.75 | 4.06 | 3.77 | 4.28 | 3.89 | 4.03 | 5.65 | 3.98 | -      | -      | -                    |
| ARM-3-3  | 3.93 | 5.07 | 3.53 | 4.86 | 3.62 | 3.56 | 3.64 | 3.98 | 3.77 | 4.17 | 3.64 | 3.82 | 5.51 | 3.82 | -      | -      | -                    |
| ARM-3-4  | 4.89 | 5.37 | 3.84 | 5.13 | 4.12 | 3.82 | 3.95 | 4.34 | 3.94 | 5.07 | 4.53 | 4.12 | 6.69 | 4.62 | -      | -      | -                    |
| ARM-3-5  | 4.29 | 5.56 | 3.85 | 5.21 | 4.13 | 3.89 | 3.99 | 4.39 | 4.23 | 4.59 | 4.04 | 4.18 | 6.16 | 4.27 | -      | -      | -                    |
| ARM-3-6  | 4.88 | 5.55 | 3.95 | 5.27 | 4.08 | 3.94 | 4.01 | 4.34 | 4.06 | 5.13 | 4.67 | 4.27 | 6.77 | 4.76 | -      | -      | -                    |
| ARM-3-7  | 4.25 | 5.46 | 3.80 | 5.13 | 3.95 | 3.83 | 3.97 | 4.23 | 4.02 | 4.42 | 3.90 | 4.25 | 5.83 | 4.08 | -      | -      | -                    |
| ARM-3-8  | 4.24 | 5.52 | 3.72 | 4.94 | 3.77 | 3.66 | 3.70 | 3.98 | 3.76 | 4.32 | 3.82 | 3.88 | 5.87 | 4.00 | -      | -      | -                    |
| ARM-3-9  | 4.17 | 5.38 | 3.65 | 5.08 | 3.87 | 3.59 | 3.69 | 4.02 | 3.83 | 4.35 | 3.99 | 3.91 | 5.84 | 4.10 | -      | -      | -                    |
| ARM-3-10 | 4.43 | 5.43 | 3.72 | 5.15 | 3.94 | 3.84 | 3.94 | 4.24 | 4.02 | 4.63 | 3.91 | 4.19 | 5.96 | 4.15 | -      | -      | -                    |
| ARM-3-11 | 5.06 | 6.32 | 4.35 | 5.76 | 4.55 | 4.23 | 4.36 | 4.71 | 4.51 | 5.22 | 4.58 | 4.64 | 6.81 | 4.69 | -      | -      | -                    |
| ARM-3-12 | 4.65 | 5.90 | 4.04 | 5.39 | 4.21 | 3.94 | 4.14 | 4.35 | 4.12 | 4.85 | 4.37 | 4.36 | 6.46 | 4.46 | -      | -      | -                    |
| ARM-3-13 | 4.27 | 6.01 | 3.87 | 5.14 | 3.77 | 3.68 | 3.65 | 3.92 | 3.78 | 4.35 | 3.35 | 3.91 | 5.73 | 3.90 | -      | -      | -                    |
| ARM-3-14 | 4.54 | 5.18 | 3.84 | 5.17 | 4.18 | 3.90 | 3.89 | 4.17 | 4.03 | 4.58 | 3.74 | 4.14 | 6.04 | 4.22 | -      | -      | -                    |
| ARM-3-15 | 3.99 | 3.95 | 3.08 | 4.60 | 3.56 | 3.37 | 3.49 | 3.87 | 3.79 | 4.22 | 3.51 | 3.86 | 5.46 | 4.09 | -      | -      | -                    |
| ARM-3-16 | 4.09 | 5.10 | 3.63 | 4.77 | 3.80 | 3.51 | 3.64 | 3.97 | 3.70 | 4.28 | 3.74 | 3.93 | 5.53 | 3.91 | -      | -      | -                    |
| ARM-3-17 | 4.46 | 5.34 | 3.79 | 5.19 | 4.16 | 3.92 | 4.05 | 4.39 | 3.99 | 4.79 | 4.18 | 4.34 | 6.38 | 4.43 | -      | -      | -                    |

Note:

1.  $Ce/Ce^* = Ce_N / \sqrt{La_N * Pr_N}$ ;  $Eu/Eu^* = Eu_N / \sqrt{Sm_N * Gd_N}$ .

2. "N" represents normalized by Chondrite values <sup>31</sup>.

3. Rare earth element contents in cassiterite samples are given in ng g<sup>-1</sup> and glass reference materials are given in μg g<sup>-1</sup>.

**Table S4** Rare earth element contents of cassiterite samples investigated in this study obtained by LA-ICP-MS/MS.

| Sample                                                               | La   | Ce   | Pr   | Nd   | Sm   | Eu   | Gd   | Tb   | Dy   | Ho   | Er   | Tm   | Yb   | Lu   | Ce/Ce* | Eu/Eu* | (La/Yb) <sub>N</sub> |
|----------------------------------------------------------------------|------|------|------|------|------|------|------|------|------|------|------|------|------|------|--------|--------|----------------------|
| 19HS, Huangsha quartz-vien type tin deposit, Jiangxi Province, China |      |      |      |      |      |      |      |      |      |      |      |      |      |      |        |        |                      |
| 19HS-1                                                               | 242  | 883  | 83.7 | 324  | 77.6 | 28.4 | 84.4 | 15.8 | 121  | 28.5 | 97.0 | 21.9 | 254  | 45.1 | 1.52   | 1.07   | 0.682                |
| 19HS-2                                                               | 478  | 1987 | 228  | 1029 | 386  | 244  | 599  | 163  | 1461 | 377  | 1462 | 307  | 3014 | 568  | 1.48   | 1.55   | 0.114                |
| 19HS-3                                                               | 104  | 498  | 38.1 | 152  | 49.0 | 29.4 | 73.2 | 17.7 | 153  | 36.3 | 120  | 24.4 | 267  | 49.0 | 1.94   | 1.50   | 0.280                |
| 19HS-4                                                               | 324  | 923  | 93.9 | 415  | 181  | 95.4 | 251  | 59.7 | 490  | 103  | 345  | 57.2 | 643  | 117  | 1.30   | 1.37   | 0.362                |
| 19HS-5                                                               | 149  | 577  | 50.0 | 214  | 70.5 | 42.1 | 125  | 34.5 | 312  | 72.5 | 265  | 59.0 | 572  | 104  | 1.64   | 1.37   | 0.187                |
| 19HS-6                                                               | 87.3 | 298  | 18.5 | 66.3 | 15.8 | 7.86 | 16.1 | 3.50 | 23.4 | 5.34 | 21.3 | 4.06 | 52.2 | 13.4 | 1.82   | 1.51   | 1.199                |
| 19HS-7                                                               | 15.8 | 145  | 5.49 | 23.2 | 6.13 | 4.07 | 6.57 | 1.08 | 7.14 | 2.27 | 8.27 | 2.21 | 28.5 | 6.64 | 3.83   | 1.96   | 0.397                |
| 19HS-8                                                               | 22.8 | 153  | 6.37 | 20.4 | 7.03 | 3.76 | 6.27 | 0.96 | 7.29 | 2.27 | 7.91 | 1.75 | 22.6 | 7.17 | 3.12   | 1.73   | 0.725                |
| 19HS-9                                                               | 317  | 1181 | 101  | 377  | 128  | 60.5 | 181  | 42.2 | 325  | 73.5 | 220  | 40.3 | 472  | 85.4 | 1.62   | 1.22   | 0.482                |
| 19HS-10                                                              | 127  | 349  | 28.7 | 130  | 48.5 | 26.7 | 83.4 | 20.6 | 155  | 33.8 | 109  | 20.0 | 218  | 56.6 | 1.41   | 1.28   | 0.420                |
| XBD, Xuebaoding pegmatite tin deposit, Sichuan Province, China       |      |      |      |      |      |      |      |      |      |      |      |      |      |      |        |        |                      |
| XBD-1                                                                | 7.27 | 95.7 | 1.59 | 3.60 | 2.86 | 4.61 | 1.92 | 0.70 | 13.6 | 7.17 | 62.0 | 39.5 | 638  | 251  | 6.90   | 6.01   | 0.008                |
| XBD-2                                                                | 2.47 | 76.6 | 1.30 | 1.13 | 0.67 | 0.43 | 1.13 | 0.59 | 6.89 | 5.43 | 50.4 | 32.8 | 610  | 203  | 10.5   | 1.52   | 0.003                |
| XBD-3                                                                | 3.18 | 86.7 | 1.08 | 1.14 | 1.34 | 0.97 | 1.92 | 0.59 | 10.9 | 4.81 | 32.9 | 14.8 | 572  | 189  | 11.4   | 1.85   | 0.004                |
| XBD-4                                                                | 1.96 | 88.9 | 0.59 | 1.30 | 0.54 | 1.50 | 0.61 | 0.48 | 12.5 | 7.14 | 69.6 | 42.1 | 721  | 289  | 20.3   | 8.01   | 0.002                |
| XBD-5                                                                | 2.79 | 97.8 | 0.82 | 1.34 | 0.50 | 2.43 | 1.25 | 0.86 | 13.9 | 7.84 | 82.1 | 50.4 | 849  | 290  | 15.9   | 9.41   | 0.002                |
| XBD-6                                                                | 1.14 | 142  | 0.94 | 0.94 | 0.42 | 1.94 | 0.68 | 1.04 | 6.78 | 3.20 | 35.4 | 18.3 | 620  | 236  | 33.6   | 11.1   | 0.001                |
| XBD-7                                                                | 1.36 | 138  | 0.55 | 1.09 | 0.57 | 0.97 | 0.79 | 0.35 | 10.8 | 5.40 | 47.5 | 30.8 | 721  | 199  | 39.0   | 4.43   | 0.001                |
| XBD-8                                                                | 1.73 | 139  | 0.59 | 1.14 | 0.47 | 0.31 | 0.75 | 1.04 | 12.2 | 7.25 | 79.6 | 47.5 | 863  | 298  | 33.7   | 1.60   | 0.001                |
| XBD-9                                                                | 2.62 | 141  | 1.64 | 1.14 | 0.67 | 0.43 | 0.69 | 0.38 | 16.6 | 9.56 | 93.9 | 56.6 | 876  | 282  | 16.7   | 1.96   | 0.002                |
| XBD-10                                                               | 3.32 | 146  | 0.96 | 2.27 | 1.51 | 0.97 | 2.15 | 0.94 | 14.2 | 6.89 | 64.3 | 41.5 | 734  | 254  | 20.1   | 1.65   | 0.003                |
| Glass reference materials' results obtained by LA-ICP-MS/MS          |      |      |      |      |      |      |      |      |      |      |      |      |      |      |        |        |                      |
| Sample                                                               | La   | Ce   | Pr   | Nd   | Sm   | Eu   | Gd   | Tb   | Dy   | Ho   | Er   | Tm   | Yb   | Lu   | Ce/Ce* | Eu/Eu* | (La/Yb) <sub>N</sub> |
| NIST614-1                                                            | 0.74 | 0.82 | 0.78 | 0.77 | 0.79 | 0.79 | 0.80 | 0.78 | 0.77 | 0.79 | 0.77 | 0.78 | 0.77 | 0.77 | -      | -      | -                    |
| NIST614-2                                                            | 0.76 | 0.87 | 0.82 | 0.79 | 0.80 | 0.81 | 0.81 | 0.79 | 0.81 | 0.79 | 0.79 | 0.77 | 0.77 | 0.77 | -      | -      | -                    |
| NIST614-3                                                            | 0.71 | 0.80 | 0.76 | 0.76 | 0.74 | 0.76 | 0.75 | 0.72 | 0.73 | 0.72 | 0.72 | 0.71 | 0.71 | 0.71 | -      | -      | -                    |



**Table S4** (Continued) Rare earth element contents of cassiterite samples investigated in this study obtained by LA-ICP-MS/MS.

| Sample     | La   | Ce   | Pr   | Nd   | Sm   | Eu   | Gd   | Tb   | Dy   | Ho   | Er   | Tm   | Yb   | Lu   | Ce/Ce* | Eu/Eu* | (La/Yb) <sub>N</sub> |
|------------|------|------|------|------|------|------|------|------|------|------|------|------|------|------|--------|--------|----------------------|
| NIST614-4  | 0.67 | 0.76 | 0.72 | 0.68 | 0.69 | 0.72 | 0.69 | 0.67 | 0.67 | 0.69 | 0.67 | 0.67 | 0.67 | 0.68 | -      | -      | -                    |
| NIST614-5  | 0.73 | 0.82 | 0.77 | 0.79 | 0.77 | 0.78 | 0.78 | 0.77 | 0.77 | 0.76 | 0.77 | 0.76 | 0.79 | 0.76 | -      | -      | -                    |
| NIST614-6  | 0.70 | 0.78 | 0.76 | 0.73 | 0.75 | 0.77 | 0.78 | 0.75 | 0.76 | 0.76 | 0.75 | 0.75 | 0.81 | 0.75 | -      | -      | -                    |
| NIST614-7  | 0.70 | 0.79 | 0.75 | 0.74 | 0.75 | 0.74 | 0.75 | 0.73 | 0.75 | 0.75 | 0.72 | 0.72 | 0.74 | 0.73 | -      | -      | -                    |
| NIST614-8  | 0.72 | 0.82 | 0.78 | 0.76 | 0.75 | 0.78 | 0.76 | 0.73 | 0.75 | 0.74 | 0.72 | 0.72 | 0.80 | 0.72 | -      | -      | -                    |
| NIST614-9  | 0.74 | 0.85 | 0.79 | 0.74 | 0.76 | 0.80 | 0.77 | 0.75 | 0.75 | 0.76 | 0.75 | 0.74 | 0.80 | 0.73 | -      | -      | -                    |
| NIST614-10 | 0.72 | 0.81 | 0.76 | 0.76 | 0.76 | 0.76 | 0.74 | 0.71 | 0.71 | 0.72 | 0.72 | 0.69 | 0.73 | 0.70 | -      | -      | -                    |
| NIST614-11 | 0.75 | 0.84 | 0.80 | 0.76 | 0.77 | 0.81 | 0.78 | 0.78 | 0.79 | 0.78 | 0.75 | 0.76 | 0.80 | 0.77 | -      | -      | -                    |
| NIST614-12 | 0.70 | 0.78 | 0.74 | 0.75 | 0.78 | 0.77 | 0.77 | 0.74 | 0.74 | 0.75 | 0.75 | 0.73 | 0.75 | 0.74 | -      | -      | -                    |
| NIST614-13 | 0.71 | 0.81 | 0.77 | 0.74 | 0.75 | 0.73 | 0.77 | 0.75 | 0.74 | 0.75 | 0.73 | 0.73 | 0.76 | 0.73 | -      | -      | -                    |
| NIST614-14 | 0.75 | 0.84 | 0.79 | 0.78 | 0.76 | 0.81 | 0.78 | 0.75 | 0.75 | 0.78 | 0.77 | 0.76 | 0.79 | 0.76 | -      | -      | -                    |
| NIST614-15 | 0.70 | 0.80 | 0.76 | 0.72 | 0.74 | 0.76 | 0.74 | 0.71 | 0.72 | 0.71 | 0.72 | 0.70 | 0.77 | 0.69 | -      | -      | -                    |
| NIST614-16 | 0.70 | 0.80 | 0.76 | 0.76 | 0.72 | 0.75 | 0.74 | 0.71 | 0.74 | 0.73 | 0.72 | 0.72 | 0.79 | 0.71 | -      | -      | -                    |
| NIST614-17 | 0.73 | 0.81 | 0.76 | 0.74 | 0.75 | 0.76 | 0.78 | 0.75 | 0.76 | 0.76 | 0.74 | 0.75 | 0.78 | 0.75 | -      | -      | -                    |
| NIST614-18 | 0.73 | 0.82 | 0.78 | 0.77 | 0.78 | 0.78 | 0.79 | 0.75 | 0.75 | 0.76 | 0.75 | 0.76 | 0.76 | 0.75 | -      | -      | -                    |
| NIST614-19 | 0.71 | 0.80 | 0.75 | 0.75 | 0.74 | 0.76 | 0.75 | 0.73 | 0.73 | 0.74 | 0.74 | 0.73 | 0.77 | 0.72 | -      | -      | -                    |
| NIST614-20 | 0.71 | 0.80 | 0.75 | 0.74 | 0.74 | 0.77 | 0.74 | 0.73 | 0.73 | 0.74 | 0.71 | 0.72 | 0.78 | 0.72 | -      | -      | -                    |
| NIST614-21 | 0.74 | 0.84 | 0.79 | 0.75 | 0.77 | 0.78 | 0.77 | 0.74 | 0.75 | 0.74 | 0.75 | 0.71 | 0.77 | 0.73 | -      | -      | -                    |
| NIST614-22 | 0.71 | 0.81 | 0.78 | 0.76 | 0.75 | 0.77 | 0.74 | 0.73 | 0.75 | 0.75 | 0.75 | 0.72 | 0.80 | 0.73 | -      | -      | -                    |
| NIST614-23 | 0.66 | 0.76 | 0.70 | 0.70 | 0.69 | 0.74 | 0.71 | 0.69 | 0.69 | 0.71 | 0.69 | 0.68 | 0.74 | 0.68 | -      | -      | -                    |
| NIST614-24 | 0.67 | 0.78 | 0.73 | 0.71 | 0.71 | 0.72 | 0.71 | 0.71 | 0.72 | 0.72 | 0.73 | 0.71 | 0.72 | 0.71 | -      | -      | -                    |
| NIST614-25 | 0.77 | 0.85 | 0.81 | 0.80 | 0.81 | 0.79 | 0.80 | 0.77 | 0.79 | 0.77 | 0.77 | 0.76 | 0.79 | 0.76 | -      | -      | -                    |
| NIST614-26 | 0.78 | 0.86 | 0.83 | 0.80 | 0.80 | 0.83 | 0.83 | 0.79 | 0.78 | 0.79 | 0.78 | 0.77 | 0.85 | 0.78 | -      | -      | -                    |
| NIST612-1  | 36.2 | 40.6 | 38.6 | 35.6 | 37.4 | 35.4 | 38.2 | 37.3 | 36.3 | 38.8 | 38.0 | 38.0 | 37.7 | 37.5 | -      | -      | -                    |
| NIST612-2  | 37.5 | 41.8 | 39.5 | 36.5 | 38.4 | 36.2 | 39.4 | 38.6 | 37.5 | 39.8 | 39.5 | 39.0 | 38.8 | 38.6 | -      | -      | -                    |
| NIST612-3  | 35.8 | 39.8 | 37.8 | 34.9 | 36.5 | 34.7 | 37.3 | 36.4 | 35.2 | 37.6 | 37.0 | 36.6 | 36.4 | 36.3 | -      | -      | -                    |
| NIST612-4  | 35.7 | 39.7 | 37.8 | 34.9 | 36.4 | 34.4 | 37.1 | 36.2 | 35.2 | 37.3 | 36.8 | 36.6 | 36.4 | 36.2 | -      | -      | -                    |
| NIST612-5  | 34.0 | 37.2 | 35.7 | 34.1 | 35.0 | 33.6 | 35.7 | 34.8 | 33.4 | 36.3 | 35.8 | 35.8 | 37.6 | 35.2 | -      | -      | -                    |

**Table S4** (Continued) Rare earth element contents of cassiterite samples investigated in this study obtained by LA-ICP-MS/MS.

| Sample     | La   | Ce   | Pr   | Nd   | Sm   | Eu   | Gd   | Tb   | Dy   | Ho   | Er   | Tm   | Yb   | Lu   | Ce/Ce* | Eu/Eu* | (La/Yb) <sub>N</sub> |
|------------|------|------|------|------|------|------|------|------|------|------|------|------|------|------|--------|--------|----------------------|
| NIST612-6  | 36.2 | 39.3 | 37.4 | 36.1 | 36.9 | 35.4 | 38.3 | 37.4 | 36.0 | 39.0 | 38.8 | 38.2 | 40.3 | 37.9 | -      | -      | -                    |
| NIST612-7  | 36.2 | 39.6 | 38.0 | 36.3 | 37.2 | 35.2 | 38.4 | 37.3 | 36.2 | 39.1 | 38.4 | 38.0 | 40.1 | 37.3 | -      | -      | -                    |
| NIST612-8  | 36.8 | 40.3 | 38.3 | 36.5 | 37.5 | 35.7 | 38.4 | 37.3 | 36.4 | 39.1 | 38.5 | 38.1 | 40.3 | 37.5 | -      | -      | -                    |
| NIST612-9  | 36.3 | 39.9 | 37.8 | 36.1 | 36.7 | 35.2 | 37.6 | 36.4 | 35.2 | 38.0 | 37.2 | 36.9 | 39.1 | 36.3 | -      | -      | -                    |
| NIST612-10 | 39.3 | 43.5 | 41.2 | 39.0 | 39.6 | 38.1 | 40.6 | 39.4 | 38.2 | 41.0 | 40.5 | 39.9 | 42.2 | 39.2 | -      | -      | -                    |
| NIST612-11 | 35.4 | 38.1 | 36.2 | 34.6 | 36.2 | 34.1 | 36.9 | 35.9 | 34.8 | 37.8 | 37.3 | 37.2 | 39.5 | 36.8 | -      | -      | -                    |
| NIST612-12 | 37.2 | 40.3 | 38.5 | 36.6 | 38.1 | 35.9 | 39.2 | 38.3 | 36.9 | 39.9 | 39.6 | 39.3 | 41.1 | 38.7 | -      | -      | -                    |
| NIST612-13 | 37.5 | 40.9 | 38.6 | 37.0 | 38.1 | 36.2 | 38.9 | 38.4 | 36.9 | 40.1 | 39.4 | 39.4 | 41.5 | 38.9 | -      | -      | -                    |
| NIST612-14 | 37.1 | 40.7 | 38.6 | 36.9 | 38.1 | 36.1 | 38.4 | 38.2 | 36.6 | 39.4 | 39.2 | 39.0 | 41.1 | 38.4 | -      | -      | -                    |
| NIST612-15 | 37.2 | 40.1 | 38.2 | 36.7 | 38.1 | 36.4 | 38.2 | 37.9 | 36.7 | 39.6 | 39.1 | 38.9 | 41.2 | 38.6 | -      | -      | -                    |
| NIST612-16 | 38.8 | 42.9 | 40.3 | 38.6 | 39.3 | 37.6 | 39.4 | 39.0 | 37.2 | 40.5 | 39.8 | 39.7 | 42.0 | 39.4 | -      | -      | -                    |
| NIST612-17 | 37.0 | 40.9 | 38.3 | 36.5 | 37.5 | 35.8 | 39.0 | 38.2 | 36.3 | 39.5 | 39.1 | 39.0 | 41.0 | 38.5 | -      | -      | -                    |
| NIST612-18 | 36.5 | 39.2 | 37.3 | 35.6 | 36.8 | 35.7 | 38.5 | 37.9 | 36.3 | 39.4 | 38.8 | 38.7 | 40.3 | 38.3 | -      | -      | -                    |
| NIST612-19 | 37.4 | 40.1 | 38.0 | 36.7 | 37.4 | 35.9 | 39.3 | 38.7 | 37.2 | 40.3 | 39.8 | 39.6 | 41.0 | 39.2 | -      | -      | -                    |
| NIST612-20 | 37.6 | 39.8 | 38.3 | 37.2 | 37.2 | 36.2 | 39.3 | 38.7 | 37.2 | 40.5 | 39.9 | 39.6 | 41.2 | 39.1 | -      | -      | -                    |
| NIST612-21 | 37.9 | 40.5 | 38.6 | 37.5 | 37.9 | 36.4 | 40.3 | 39.5 | 38.0 | 40.9 | 40.8 | 40.4 | 41.9 | 40.2 | -      | -      | -                    |
| NIST612-22 | 39.1 | 42.6 | 40.0 | 38.1 | 39.2 | 37.7 | 41.0 | 40.2 | 38.3 | 41.4 | 41.0 | 40.9 | 42.8 | 40.3 | -      | -      | -                    |
| NIST612-23 | 33.7 | 36.8 | 35.6 | 33.0 | 34.6 | 33.2 | 35.6 | 35.3 | 34.1 | 36.4 | 36.3 | 36.1 | 38.3 | 35.8 | -      | -      | -                    |
| NIST612-24 | 35.1 | 37.9 | 36.4 | 34.1 | 36.1 | 34.3 | 36.7 | 36.4 | 35.2 | 37.6 | 37.3 | 37.1 | 39.6 | 36.8 | -      | -      | -                    |
| NIST612-25 | 38.7 | 41.4 | 40.1 | 37.6 | 39.2 | 36.8 | 39.8 | 39.0 | 37.3 | 40.0 | 39.6 | 39.3 | 42.8 | 39.2 | -      | -      | -                    |
| NIST612-26 | 38.9 | 41.7 | 40.0 | 37.9 | 39.3 | 36.8 | 39.8 | 39.1 | 37.6 | 40.2 | 39.9 | 39.7 | 43.3 | 39.5 | -      | -      | -                    |

Note:

1.  $Ce/Ce^* = Ce_N / \sqrt{La_N * Pr_N}$ ;  $Eu/Eu^* = Eu_N / \sqrt{Sm_N * Gd_N}$ .

2. "N" represents normalized by Chondrite values <sup>31</sup>.

3. Rare earth element contents in cassiterite samples are given in ng g<sup>-1</sup> and glass reference materials are given in μg g<sup>-1</sup>.

**Table S5** Signal intensity data (cps) obtained by LA-ICP-MS/MS in this study.

| Sample                                                               | La     | Ce     | Pr     | Nd     | Sm    | Eu    | Gd    | Tb     | Dy     | Ho     | Er     | Tm     | Yb     | Lu     |
|----------------------------------------------------------------------|--------|--------|--------|--------|-------|-------|-------|--------|--------|--------|--------|--------|--------|--------|
| 19HS, Huangsha quartz-vien type tin deposit, Jiangxi Province, China |        |        |        |        |       |       |       |        |        |        |        |        |        |        |
| 19HS-1                                                               | 77223  | 261201 | 29232  | 32384  | 8776  | 2504  | 7651  | 5099   | 13285  | 10556  | 20046  | 8435   | 24482  | 15585  |
| 19HS-2                                                               | 152616 | 587553 | 79688  | 102750 | 43621 | 21539 | 54303 | 52400  | 160231 | 139320 | 302136 | 118005 | 290133 | 196029 |
| 19HS-3                                                               | 33328  | 147314 | 13321  | 15207  | 5540  | 2594  | 6641  | 5693   | 16721  | 13416  | 24903  | 9374   | 25704  | 16914  |
| 19HS-4                                                               | 103580 | 273038 | 32792  | 41446  | 20451 | 8417  | 22748 | 19232  | 53719  | 38227  | 71266  | 21991  | 61861  | 40505  |
| 19HS-5                                                               | 47617  | 170701 | 17458  | 21379  | 7973  | 3711  | 11366 | 11113  | 34225  | 26802  | 54812  | 22682  | 55065  | 35860  |
| 19HS-6                                                               | 27885  | 88018  | 6463   | 6619   | 1786  | 694   | 1463  | 1126   | 2569   | 1976   | 4411   | 1559   | 5027   | 4622   |
| 19HS-7                                                               | 5033   | 42995  | 1917   | 2318   | 694   | 359   | 595   | 348    | 782    | 838    | 1710   | 851    | 2742   | 2292   |
| 19HS-8                                                               | 7285   | 45369  | 2225   | 2035   | 795   | 332   | 568   | 309    | 799    | 838    | 1635   | 673    | 2171   | 2475   |
| 19HS-9                                                               | 101199 | 349273 | 35442  | 37663  | 14445 | 5340  | 16370 | 13589  | 35586  | 27162  | 45421  | 15488  | 45411  | 29504  |
| 19HS-10                                                              | 40732  | 103223 | 10024  | 13001  | 5488  | 2353  | 7563  | 6621   | 16942  | 12488  | 22549  | 7693   | 20963  | 19557  |
| XBD, Xuebaoding pegmatite tin deposit, Sichuan Province, China       |        |        |        |        |       |       |       |        |        |        |        |        |        |        |
| XBD-1                                                                | 2322   | 28311  | 557    | 360    | 323   | 407   | 175   | 224    | 1486   | 2651   | 12817  | 15187  | 61371  | 86585  |
| XBD-2                                                                | 790    | 22663  | 453    | 113    | 76    | 38    | 103   | 190    | 755    | 2006   | 10413  | 12594  | 58697  | 70232  |
| XBD-3                                                                | 1017   | 25630  | 379    | 114    | 152   | 86    | 175   | 190    | 1198   | 1777   | 6798   | 5707   | 55044  | 65138  |
| XBD-4                                                                | 625    | 26272  | 206    | 129    | 61    | 132   | 55    | 155    | 1366   | 2640   | 14391  | 16167  | 69394  | 99737  |
| XBD-5                                                                | 890    | 28922  | 287    | 133    | 57    | 214   | 113   | 276    | 1522   | 2900   | 16968  | 19381  | 81748  | 100133 |
| XBD-6                                                                | 365    | 41908  | 327    | 94     | 48    | 171   | 61    | 336    | 743    | 1185   | 7317   | 7023   | 59676  | 81500  |
| XBD-7                                                                | 436    | 40835  | 193    | 108    | 64    | 86    | 72    | 112    | 1186   | 1996   | 9825   | 11837  | 69375  | 68693  |
| XBD-8                                                                | 553    | 41100  | 207    | 114    | 53    | 32    | 68    | 336    | 1342   | 2682   | 16449  | 18239  | 83028  | 102893 |
| XBD-9                                                                | 837    | 41651  | 572    | 114    | 76    | 38    | 62    | 121    | 1822   | 3534   | 19407  | 21738  | 84271  | 97516  |
| XBD-10                                                               | 1062   | 43289  | 334    | 227    | 171   | 86    | 195   | 302    | 1558   | 2547   | 13284  | 15968  | 70637  | 87585  |
| Glass reference materials                                            |        |        |        |        |       |       |       |        |        |        |        |        |        |        |
| NIST614-1                                                            | 235788 | 238152 | 266083 | 77298  | 88335 | 69444 | 73173 | 254084 | 84818  | 297927 | 162969 | 305682 | 76733  | 272702 |
| NIST614-2                                                            | 242749 | 250680 | 278551 | 78447  | 89848 | 71680 | 74176 | 256100 | 89311  | 295733 | 166359 | 302096 | 78998  | 271695 |
| NIST614-3                                                            | 225474 | 232510 | 259823 | 76322  | 83060 | 66762 | 67862 | 233559 | 80945  | 270399 | 152361 | 279878 | 73376  | 251610 |
| NIST614-4                                                            | 211839 | 220812 | 245482 | 68389  | 77763 | 63458 | 62623 | 216431 | 74053  | 259945 | 141476 | 262982 | 68939  | 238765 |
| NIST614-5                                                            | 235788 | 238152 | 266083 | 77298  | 88335 | 69444 | 73173 | 254084 | 84818  | 297927 | 162969 | 305682 | 76733  | 272702 |
| NIST614-6                                                            | 235788 | 238152 | 266083 | 77298  | 88335 | 69444 | 73173 | 254084 | 84818  | 297927 | 162969 | 305682 | 76733  | 272702 |
| NIST614-7                                                            | 235788 | 238152 | 266083 | 77298  | 88335 | 69444 | 73173 | 254084 | 84818  | 297927 | 162969 | 305682 | 76733  | 272702 |
| NIST614-8                                                            | 242749 | 250680 | 278551 | 78447  | 89848 | 71680 | 74176 | 256100 | 89311  | 295733 | 166359 | 302096 | 78998  | 271695 |
| NIST614-9                                                            | 225474 | 232510 | 259823 | 76322  | 83060 | 66762 | 67862 | 233559 | 80945  | 270399 | 152361 | 279878 | 73376  | 251610 |
| NIST614-10                                                           | 211839 | 220812 | 245482 | 68389  | 77763 | 63458 | 62623 | 216431 | 74053  | 259945 | 141476 | 262982 | 68939  | 238765 |
| NIST614-11                                                           | 236154 | 245101 | 276568 | 74073  | 85272 | 69421 | 69302 | 243836 | 84796  | 277849 | 149555 | 283349 | 75975  | 257489 |
| NIST614-12                                                           | 222085 | 227629 | 258294 | 73055  | 85881 | 65777 | 68125 | 232588 | 79279  | 268898 | 151022 | 269348 | 71729  | 247177 |
| NIST614-13                                                           | 224777 | 235723 | 265941 | 72292  | 82810 | 62628 | 68208 | 233975 | 79441  | 266633 | 146134 | 270160 | 72064  | 246486 |

**Table S5** (Continued) Signal intensity data (cps) obtained by LA-ICP-MS/MS in this study.

| Sample     | La       | Ce       | Pr       | Nd      | Sm      | Eu      | Gd      | Tb       | Dy      | Ho       | Er      | Tm       | Yb      | Lu       |
|------------|----------|----------|----------|---------|---------|---------|---------|----------|---------|----------|---------|----------|---------|----------|
| NIST614-14 | 235759   | 243882   | 273949   | 75651   | 83876   | 69392   | 69607   | 236260   | 80832   | 276949   | 153442  | 281394   | 75416   | 255689   |
| NIST614-15 | 222300   | 232036   | 264122   | 69595   | 81262   | 65194   | 66227   | 221807   | 77159   | 255050   | 144807  | 259854   | 73740   | 230788   |
| NIST614-16 | 221547   | 231125   | 262472   | 74226   | 79257   | 64406   | 65687   | 223415   | 79408   | 259624   | 143923  | 266796   | 74857   | 237254   |
| NIST614-17 | 233722   | 242465   | 272380   | 74389   | 85693   | 67457   | 69298   | 235799   | 82282   | 272378   | 149157  | 278482   | 74469   | 251687   |
| NIST614-18 | 233883   | 243256   | 278196   | 77424   | 89536   | 68727   | 70231   | 236476   | 81510   | 275501   | 151546  | 282279   | 72202   | 253061   |
| NIST614-19 | 228747   | 237861   | 268057   | 75708   | 85114   | 67306   | 67071   | 230590   | 78859   | 266598   | 148650  | 271677   | 73335   | 242905   |
| NIST614-20 | 229057   | 239729   | 268015   | 73861   | 85430   | 68273   | 66281   | 228668   | 79413   | 267138   | 143557  | 269804   | 74922   | 242412   |
| NIST614-21 | 236886   | 249124   | 283836   | 75286   | 88088   | 68818   | 68651   | 232838   | 81057   | 267328   | 150026  | 265474   | 73449   | 247102   |
| NIST614-22 | 228772   | 242301   | 278009   | 75946   | 86377   | 68001   | 66123   | 229381   | 80923   | 270305   | 150967  | 268808   | 76849   | 244996   |
| NIST614-23 | 211493   | 237459   | 249661   | 70867   | 78848   | 66903   | 65738   | 225582   | 77418   | 268406   | 144564  | 265517   | 68873   | 231775   |
| NIST614-24 | 216013   | 244184   | 259814   | 72232   | 81360   | 65185   | 65885   | 232602   | 79985   | 273713   | 152513  | 274732   | 66973   | 242723   |
| NIST614-25 | 245782   | 267316   | 287810   | 81192   | 92789   | 71684   | 73829   | 253476   | 88568   | 292547   | 161007  | 295279   | 73497   | 259309   |
| NIST614-26 | 250655   | 270311   | 293597   | 80846   | 91216   | 75759   | 76687   | 259836   | 87724   | 298237   | 163908  | 299724   | 79278   | 266557   |
| NIST612-1  | 11556936 | 11370345 | 13232689 | 3561458 | 4283832 | 3162618 | 3431280 | 12296299 | 3950072 | 14492777 | 8003454 | 14515559 | 3739417 | 13112809 |
| NIST612-2  | 11980657 | 11684623 | 13532838 | 3648511 | 4398864 | 3237833 | 3541994 | 12696358 | 4085395 | 14869007 | 8310015 | 14886189 | 3876519 | 13518510 |
| NIST612-3  | 11438786 | 11143493 | 12951634 | 3493039 | 4181287 | 3099890 | 3347125 | 11983919 | 3836827 | 14059565 | 7797134 | 13996492 | 3701188 | 12695627 |
| NIST612-4  | 11399417 | 11099651 | 12962039 | 3486841 | 4172466 | 3077329 | 3332167 | 11926677 | 3835258 | 13961165 | 7751429 | 13990440 | 3688450 | 12666070 |
| NIST612-5  | 11556936 | 11370345 | 13232689 | 3561458 | 4283832 | 3162618 | 3431280 | 12296299 | 3950072 | 14492777 | 8003454 | 14515559 | 3739417 | 13112809 |
| NIST612-6  | 11556936 | 11370345 | 13232689 | 3561458 | 4283832 | 3162618 | 3431280 | 12296299 | 3950072 | 14492777 | 8003454 | 14515559 | 3739417 | 13112809 |
| NIST612-7  | 11556936 | 11370345 | 13232689 | 3561458 | 4283832 | 3162618 | 3431280 | 12296299 | 3950072 | 14492777 | 8003454 | 14515559 | 3739417 | 13112809 |
| NIST612-8  | 11980657 | 11684623 | 13532838 | 3648511 | 4398864 | 3237833 | 3541994 | 12696358 | 4085395 | 14869007 | 8310015 | 14886189 | 3876519 | 13518510 |
| NIST612-9  | 11438786 | 11143493 | 12951634 | 3493039 | 4181287 | 3099890 | 3347125 | 11983919 | 3836827 | 14059565 | 7797134 | 13996492 | 3701188 | 12695627 |
| NIST612-10 | 11399417 | 11099651 | 12962039 | 3486841 | 4172466 | 3077329 | 3332167 | 11926677 | 3835258 | 13961165 | 7751429 | 13990440 | 3688450 | 12666070 |
| NIST612-11 | 11209169 | 10685972 | 12610396 | 3375585 | 4065445 | 2969258 | 3236426 | 11419036 | 3692076 | 13451779 | 7464845 | 13429794 | 3621246 | 12237293 |
| NIST612-12 | 11777687 | 11302915 | 13422942 | 3562317 | 4276593 | 3126911 | 3440888 | 12188649 | 3916698 | 14194633 | 7926176 | 14186782 | 3772997 | 12886391 |
| NIST612-13 | 11873954 | 11453178 | 13437570 | 3600493 | 4282205 | 3153720 | 3416597 | 12215290 | 3914879 | 14260392 | 7892824 | 14219593 | 3803264 | 12925095 |
| NIST612-14 | 11740999 | 11407333 | 13445028 | 3597241 | 4284810 | 3143178 | 3371510 | 12155448 | 3878654 | 14020919 | 7849393 | 14077948 | 3770312 | 12757825 |
| NIST612-15 | 11798726 | 11231104 | 13326132 | 3578796 | 4280348 | 3173089 | 3356101 | 12067345 | 3891722 | 14091216 | 7832775 | 14064895 | 3782479 | 12826855 |
| NIST612-16 | 12287700 | 12028330 | 14047233 | 3759776 | 4419811 | 3273491 | 3457967 | 12421077 | 3943003 | 14417821 | 7961154 | 14331451 | 3849028 | 13088936 |
| NIST612-17 | 11531885 | 11346060 | 13249838 | 3540508 | 4235501 | 3099457 | 3306023 | 11740343 | 3742509 | 13678653 | 7596000 | 13640157 | 3716776 | 12404393 |
| NIST612-18 | 11383542 | 10882607 | 12901776 | 3448013 | 4163217 | 3084018 | 3260807 | 11631172 | 3739926 | 13637358 | 7527175 | 13528129 | 3655598 | 12340327 |
| NIST612-19 | 11674373 | 11144534 | 13126971 | 3558845 | 4226290 | 3108431 | 3332942 | 11896757 | 3835661 | 13952084 | 7723733 | 13844986 | 3715916 | 12624718 |
| NIST612-20 | 11718501 | 11061043 | 13233620 | 3601531 | 4209943 | 3126709 | 3330827 | 11887935 | 3827202 | 14042174 | 7751006 | 13839850 | 3739508 | 12588734 |
| NIST612-21 | 11818666 | 11251356 | 13337865 | 3636087 | 4288727 | 3145542 | 3412805 | 12127762 | 3911571 | 14168643 | 7917967 | 14111448 | 3799494 | 12944805 |
| NIST612-22 | 12182568 | 11827414 | 13835090 | 3692224 | 4427629 | 3256433 | 3472392 | 12352920 | 3948229 | 14352128 | 7958053 | 14288479 | 3881988 | 13004431 |

**Table S5** (Continued) Signal intensity data (cps) obtained by LA-ICP-MS/MS in this study.

| Sample     | La       | Ce       | Pr       | Nd      | Sm      | Eu      | Gd      | Tb       | Dy      | Ho       | Er      | Tm       | Yb      | Lu       |
|------------|----------|----------|----------|---------|---------|---------|---------|----------|---------|----------|---------|----------|---------|----------|
| NIST612-23 | 10856053 | 11151456 | 12663414 | 3349217 | 4029691 | 3059401 | 3246403 | 11746786 | 3765986 | 13730713 | 7634801 | 13626676 | 3506802 | 12106730 |
| NIST612-24 | 11299884 | 11476102 | 12948506 | 3468110 | 4201332 | 3152845 | 3349090 | 12115345 | 3890536 | 14182209 | 7830788 | 14005854 | 3618386 | 12438699 |
| NIST612-25 | 12462166 | 12544424 | 14264443 | 3817511 | 4562623 | 3389684 | 3629458 | 12993943 | 4120330 | 15061689 | 8316654 | 14808300 | 3916282 | 13265846 |
| NIST612-26 | 12548327 | 12615071 | 14239863 | 3845882 | 4573945 | 3388519 | 3627563 | 13038202 | 4147066 | 15152759 | 8387236 | 14951220 | 3960805 | 13352303 |

Note:

1. Calculated background counts (cps): La (60), Ce (60), Pr (60), Nd (30), Sm (30), Eu (30), Gd (30), Tb (60), Dy (30), Ho (60), Er (60), Tm (60), Yb (30), Lu (60).
2. Calculated detection limit (ng g<sup>-1</sup>): La (0.19), Ce (0.20), Pr (0.17), Nd (0.30), Sm (0.27), Eu (0.30), Gd (0.33), Tb (0.19), Dy (0.27), Ho (0.16), Er (0.29), Tm (0.16), Yb (0.31), Lu (0.17).
3. The detection limit is calculated to be three times the background ion count. All signal intensity data are above detection limit.
